# Supplementary material for: Inactivation of Pseudomonas aeruginosa and Methicillin-resistant Staphylococcus aureus in an open water system with ozone generated by a compact, atmospheric DBD plasma reactor
Source: PubMed Central journal article supplement (PMC6279761; doi:10.1038/s41598-018-36003-0), 2018-12-04
Supplement: 41598_2018_36003_MOESM1_ESM.pdf [file 41598_2018_36003_MOESM1_ESM.pdf]

# **Inactivation of *Pseudomonas aeruginosa* and Methicillin-resistant *Staphylococcus aureus* in an open water system with ozone generated by a compact, atmospheric DBD plasma reactor**

**Bhaswati Choudhury<sup>1,2</sup>, Sherlie Portugal<sup>1,3,4</sup>, Navya Mastanaiah<sup>1,2</sup>, Judith A. Johnson<sup>1,5,6</sup>, Subrata Roy<sup>1,2,7,\*</sup>**

<sup>1</sup> Applied Physics Research Group, University of Florida, 32611, Gainesville, USA

<sup>2</sup> Department of Mechanical and Aerospace Engineering, University of Florida, 32611, Gainesville, USA

<sup>3</sup> Department of Electrical and Computer Engineering, University of Florida, Gainesville, 32611, USA

<sup>4</sup> School of Electrical Engineering, Technological University of Panama, Panama City, Panama

<sup>5</sup> Department of Pathology, Immunology and Laboratory Medicine, University of Florida, Gainesville, 32611, USA

<sup>6</sup> Emerging Pathogens Institute, University of Florida, Gainesville, 32611, USA

<sup>7</sup> SurfPlasma, Inc., Gainesville 32601, USA

\*roy@ufl.edu

**Table 1:** Results obtained from repeated active ozonation experiments on water contaminated with *P. aeruginosa*. Columns two through eight shows the bacterial counts in Colony Forming Units per milliliter (CFU/ml) for active ozonation experiments at time points, t = 0, 1, 2, 3, 4, 5 and 10 minutes. The Control count is defined as the bacterial count at the start of the experiment (t=0 minutes).

| Expt. No. | Control count at t=0 min (CFU/ml) | Count at t=1 min (CFU/ml) | Count at t=2 minutes (CFU/ml) | Count at t=3 minutes (CFU/ml) | Count at t=4 minutes (CFU/ml) | Count at t=5 minutes (CFU/ml) | Count at t=10 minutes (CFU/ml) |
|-----------|-----------------------------------|---------------------------|-------------------------------|-------------------------------|-------------------------------|-------------------------------|--------------------------------|
| 1         | $2.7 \times 10^4$                 | $1.6 \times 10^3$         | $5.8 \times 10^2$             | 10                            | 0                             | 0                             | 0                              |
| 2         | $1.1 \times 10^5$                 | $3.3 \times 10^3$         | $7.1 \times 10^2$             | 10                            | 0                             | 0                             | 0                              |
| 3         | $1.1 \times 10^5$                 | $6.3 \times 10^3$         | $2 \times 10^2$               | 10                            | 0                             | 0                             | 0                              |
| 4         | $6 \times 10^4$                   | $5.8 \times 10^3$         | $1.1 \times 10^3$             | 20                            | 0                             | 0                             | 0                              |

**Table 2:** Results obtained from repeated active ozonation experiments on water contaminated with Methicillin-resistant *Staphylococcus aureus* (MRSA). Columns two through eight shows the bacterial counts in Colony Forming Units per milliliter (CFU/ml) for active ozonation experiments at time points, t = 0, 1, 2, 3, 4, 5 and 10 minutes. The Control count is defined as the bacterial count at the start of the experiment (t=0 minutes).

| Expt. No. | Control count, at t=0 min (CFU/ml) | Count at t=1 min (CFU/ml) | Count at t=2 minutes (CFU/ml) | Count at t=3 minutes (CFU/ml) | Count at t=4 minutes (CFU/ml) | Count at t=5 minutes (CFU/ml) | Count at t=10 minutes (CFU/ml) |
|-----------|------------------------------------|---------------------------|-------------------------------|-------------------------------|-------------------------------|-------------------------------|--------------------------------|
| 1         | $1.2 \times 10^5$                  | 10                        | 0                             | 0                             | 0                             | 0                             | 0                              |
| 2         | $1.1 \times 10^5$                  | 10                        | 0                             | 0                             | 0                             | 0                             | 0                              |
| 3         | $2.4 \times 10^5$                  | $5.7 \times 10^2$         | 0                             | 0                             | 0                             | 0                             | 0                              |
| 4         | $2.4 \times 10^5$                  | 60                        | 0                             | 0                             | 0                             | 0                             | 0                              |
| 5         | $1.1 \times 10^6$                  | 20                        | 0                             | 0                             | 0                             | 0                             | 0                              |

**Table 3.** Ozone measurements were taken in water during active ozonation at time points, t= 3, 4, 5 and 10 minutes. The Hach 2064400 oz-2 Color Disc Test Kit was used to take the measurements. The upper and lower limits of detection of the Color Disc were 0.05 mg/L and 2.2 mg/L respectively, with each step on the disc representing an increment of 0.05 mg/L. The average of 11 measurements at each time point was taken to calculate the ozone concentration at a time point.

| <b>Ozone concentration (mg/L)</b> |              |              |              |
|-----------------------------------|--------------|--------------|--------------|
| <b>Trials/ time</b>               | <b>2 min</b> | <b>4 min</b> | <b>5 min</b> |
| <b>1</b>                          | 0.05         | 0.1          | 0.1          |
| <b>2</b>                          | 0.05         | 0.1          | 0.15         |
| <b>3</b>                          | 0.05         | 0.05         | 0.1          |
| <b>4</b>                          | 0.05         | 0.1          | 0.1          |
| <b>5</b>                          | 0            | 0.1          | 0.15         |
| <b>6</b>                          | 0.05         | 0.1          | 0.1          |
| <b>7</b>                          | 0.05         | 0.15         | 0.2          |
| <b>8</b>                          | 0            | 0.1          | 0.1          |
| <b>9</b>                          | 0.05         | 0.05         | 0.1          |
| <b>10</b>                         | 0.05         | 0.1          | 0.15         |
| <b>11</b>                         | 0.05         | 0.1          | 0.15         |
| <b>Average</b>                    | 0.041        | 0.095        | 0.127        |
